# Supplementary material
Source: PubMed Central journal article supplement (PMC1299291)
Supplement: 6-7400381s1.pdf [file 6-7400381s1.pdf]

## SUPPLEMENTARY INFORMATION

### Methods

#### Construction of overlapping tRNA genes in *E. coli*

Constructs consisting of tRNA genes and/or HDV ribozyme sequence in overlapping and non-overlapping arrangement were amplified by overlap extension PCR (Schürer et al., 2002). Anticodons: bold, underlined characters; downstream tRNA and HDV ribozyme: italics. For diagnostic purposes, the first (overlapping) base (C) of tRNA<sup>Cys</sup> was replaced by G (underlined) to distinguish partial CCA addition from 3'-end processing downstream of the discriminator position of tRNA<sup>Tyr</sup> (see Fig. 1 and 2). Accordingly, position 72 of tRNA<sup>Tyr</sup> was replaced by C.

sup-tRNA<sup>Tyr</sup>+A/T5 tRNA<sup>Cys</sup>:

GGTGGGGTTC~~CCG~~GAGCGGCCAAAGGGAGCAGACT**CTA**AATCTGCCGTCATCGAC  
TTCGAAGGTTTCGAATCCTTCCCCCACCACCAGG**ACC**GTTGGCTGAATGGCTTAGGC  
GAAGGATT**GCA**AATCCTTTTTATGTGAGTTCAAATCTCATGCGGTC**C**TCCA

sup-tRNA<sup>Tyr</sup>-1/T5 tRNA<sup>Cys</sup>:

GGTGGGGTTC~~CCG~~GAGCGGCCAAAGGGAGCAGACT**CTA**AATCTGCCGTCATCGAC  
TTCGAAGGTTTCGAATCCTTCCCCCACCACC**G**GACCGTTGGCTGAATGGCTTAGGCG  
AAGGATT**GCA**AATCCTTTTTATGTGAGTTCAAATCTCATGCGGTC**C**TCCA

sup-tRNA<sup>Tyr</sup>+A/HDV:

GGTGGGGTTC~~CCG~~GAGCGGCCAAAGGGAGCAGACT**CTA**AATCTGCCGTCATCGAC  
TTCGAAGGTTTCGAATCCTTCCCCCACCACCAGGGUCGGCAUGGCAUCUCCACCUC

*CUCGCGGUCCGACCUGGGCUACUUCGGUAGGCCUAAGGGAGAAGCTTGGCACTGGC  
CGTCGTTT*

sup-tRNA<sup>Tyr</sup>-1/HDV:

GGTGGGGTTC<sup>CGAGCGGCCAAAGGGAGCAGACT</sup>**CTA**AATCTGCCGTCATCGAC  
TTCGAAGGTTTCGAATCCTTCCCCCACCACCGGGUCGGCAUGGCAUCUCCACCUCC  
*UCGCGGUCCGACCUGGGCUACUUCGGUAGGCCUAAGGGAGAAGCTTGGCACTGGCC  
GTCGTTT*

PCR products were inserted into plasmid pBAD30 (atcc, USA) downstream of an arabinose promoter and verified by sequencing. Correct plasmids were introduced into *E. coli* CA244 (*E. coli* Stock Center, Yale, USA), and cells were grown on LB agar plates containing 30 µg/ml ampicillin and 0.2% arabinose at 37°C.

### **Construction of overlapping tRNA genes in *S. cerevisiae***

Gene constructs for *S. cerevisiae* were generated by the same procedure as for the *E. coli* constructs. Anticodons: bold, underlined characters; downstream tRNA and HDV ribozyme: italics.

sup-tRNA<sup>Tyr</sup>+A/*E. coli*-tRNA<sup>Cys</sup>:

GGTGGGGTTC<sup>CGAGCGGCCAAAGGGAGCAGACT</sup>**CTA**AATCTGCCGTCATCGAC  
TTCGAAGGTTTCGAATCCTTCCCCCACCACCAGGCGCGTTAACAAAGCGGTTATGTAG  
*CGGATT***GCA**AATCCGTCTAGTCCGGTTCGACTCCGGAACGCGCCTCCA

sup-tRNA<sup>Tyr</sup>-1/*E. coli*-tRNA<sup>Cys</sup>:

GGTGGGGTTCCTCCGAGCGGCCAAAGGGAGCAGACTCTAAATCTGCCGTCATCGAC  
TTCGAAGGTTTCGAATCCTTCCCCACCACCGGGCGCTTAACAAAGCGGTTATGTAGC  
*GGATTGCAAATCCGTCTAGTCCGGTTCGACTCCGGAACGCGCCTCCA*

sup-tRNA<sup>Tyr</sup>+A/HDV:

GGTGGGGTTCCTCCGAGCGGCCAAAGGGAGCAGACTCTAAATCTGCCGTCATCGAC  
TTCGAAGGTTTCGAATCCTTCCCCACCACCGGGUCGGCAUGGCAUCUCCACCUC  
*CUCGCGGUCCGACCUGGGCUACUUCGGUAGGCUAAGGGAGAAGCTTGGCACTGGC  
CGTCGTTT*

sup-tRNA<sup>Tyr</sup>-1/HDV:

GGTGGGGTTCCTCCGAGCGGCCAAAGGGAGCAGACTCTAAATCTGCCGTCATCGAC  
TTCGAAGGTTTCGAATCCTTCCCCACCACCGGGUCGGCAUGGCAUCUCCACCUC  
*UCGCGGUCCGACCUGGGCUACUUCGGUAGGCUAAGGGAGAAGCTTGGCACTGGCC  
GTCGTTT*

Products were inserted downstream of the galactose promoter of plasmid Y352\_gal1, analyzed by sequencing and introduced into *S. cerevisiae* BY 4741 (Gietz and Woods, 2002). Expression was induced during growth for 48 h at 30°C in uracil-dropout medium containing 2% galactose.

## REFERENCES

- Gietz RD, Woods RA (2002) Transformation of yeast by lithium acetate/single-stranded carrier DNA/polyethylene glycol method. *Methods Enzymol.* **350**: 87-96  
Schürer H, Lang K, Schuster J, Mörl M (2002) A universal method to produce in vitro transcripts with homogeneous 3' ends. *Nucleic Acids Res.* **30**: e56
